# Supplementary material for: The Catalytic Influence of Polymers and Surfactants on the Rate Constants of Reaction of Maltose with Cerium (IV) in Acidic Aqueous Medium
Source: Hindawi journal article supplement (doi:10.1155/2022/2609478), 2022-07-01
Supplement: f1 [file 2609478.f1.docx]

**Table 1S:** Absorbance vs. time at the following conditions: [Ce(IV)] = 4.0 x 10-4 mol dm-3, [maltose] = 6.0 x 10-3 mol dm-3, [H2SO4] = 0.20 mol dm-3 and at 293 K.

| **Time / s** | **Absorbance (Trial 1)** | **Absorbance (Trial 2)** | **Absorbance (Trial 3)** |
| --- | --- | --- | --- |
| 20 | 0.235 | 0.243 | 0.261 |
| 30 | 0.231 | 0.238 | 0.254 |
| 40 | 0.226 | 0.233 | 0.249 |
| 50 | 0.221 | 0.228 | 0.243 |
| 60 | 0.216 | 0.222 | 0.238 |
| 70 | 0.211 | 0.215 | 0.232 |
| 80 | 0.206 | 0.212 | 0.227 |
| 90 | 0.201 | 0.207 | 0.221 |
| 100 | 0.196 | 0.202 | 0.216 |
| 110 | 0.191 | 0.197 | 0.210 |
| 120 | 0.186 | 0.192 | 0.205 |
| 130 | 0.181 | 0.186 | 0.199 |
| 140 | 0.177 | 0.181 | 0.195 |
| 150 | 0.172 | 0.177 | 0.189 |
| 160 | 0.168 | 0.173 | 0.185 |
| 170 | 0.164 | 0.169 | 0.180 |
| 180 | 0.159 | 0.164 | 0.174 |
| 190 | 0.155 | 0.160 | 0.171 |
| 200 | 0.151 | 0.156 | 0.166 |
| 210 | 0.147 | 0.151 | 0.162 |
| 220 | 0.143 | 0.146 | 0.157 |
| 230 | 0.139 | 0.143 | 0.153 |
| 240 | 0.136 | 0.140 | 0.150 |
| 250 | 0.132 | 0.136 | 0.145 |
| 260 | 0.129 | 0.133 | 0.142 |
| 270 | 0.125 | 0.128 | 0.138 |
| 280 | 0.122 | 0.126 | 0.134 |
| 290 | 0.119 | 0.123 | 0.131 |
| 300 | 0.116 | 0.119 | 0.127 |
| 310 | 0.112 | 0.115 | 0.123 |
| 320 | 0.11 | 0.113 | 0.121 |
| 330 | 0.107 | 0.109 | 0.115 |
| **Kobs** | **0.00198** | **0.00199** | **0.00196** |
| **Average kobs = 0.00198** | **Standard deviation = 1.00 x10-5** | **Standard Error = 5.77 x 10-6** |  |

**Table 2S** Absorbance vs. time at the following conditions: [Ce(IV)] = 4.5 x 10-4 mol dm-3, [maltose] = 6.0 x 10-3 mol dm-3 ,[H2SO4] = 0.20 mol dm-3 and at 293 K.

| **Time / s** | **Absorbance (Trial 1)** | **Absorbance (Trial 2)** | **Absorbance (Trial 3)** |
| --- | --- | --- | --- |
| 20 | 0.253 | 0.263 | 0.266 |
| 30 | 0.242 | 0.250 | 0.257 |
| 40 | 0.231 | 0.240 | 0.247 |
| 50 | 0.22 | 0.229 | 0.234 |
| 60 | 0.209 | 0.217 | 0.224 |
| 70 | 0.198 | 0.206 | 0.212 |
| 80 | 0.188 | 0.195 | 0.201 |
| 90 | 0.178 | 0.185 | 0.191 |
| 100 | 0.169 | 0.176 | 0.180 |
| 110 | 0.16 | 0.166 | 0.171 |
| 120 | 0.151 | 0.155 | 0.162 |
| 130 | 0.143 | 0.149 | 0.153 |
| 140 | 0.136 | 0.141 | 0.146 |
| 150 | 0.129 | 0.134 | 0.138 |
| 160 | 0.122 | 0.127 | 0.131 |
| 170 | 0.116 | 0.121 | 0.124 |
| 180 | 0.109 | 0.113 | 0.114 |
| 190 | 0.103 | 0.105 | 0.110 |
| 200 | 0.098 | 0.102 | 0.105 |
| 210 | 0.093 | 0.097 | 0.100 |
| 220 | 0.087 | 0.090 | 0.090 |
| 230 | 0.083 | 0.086 | 0.089 |
| 240 | 0.079 | 0.083 | 0.085 |
| 250 | 0.074 | 0.077 | 0.079 |
| 260 | 0.07 | 0.073 | 0.075 |
| 270 | 0.067 | 0.070 | 0.072 |
| 280 | 0.063 | 0.065 | 0.067 |
| 290 | 0.059 | 0.060 | 0.063 |
| 300 | 0.056 | 0.058 | 0.061 |
| 310 | 0.054 | 0.056 | 0.058 |
| 320 | 0.052 | 0.054 | 0.056 |
| 330 | 0.05 | 0.052 | 0.054 |
| **Kobs** | **0.00508** | **0.00513** | **0.00499** |
| **Average kobs = 0.00507** | **Standard deviation = 7.09 x 10-5** | **Standard Error = 4.09 x 10-5** |  |

**Table 3S:** Absorbance vs. time at the following conditions: [Ce(IV)] = 6.0 x 10-4 mol dm-3, [maltose] = 6.0 x 10-3 mol dm-3, [H2SO4] = 0.20 mol dm-3 and at 293 K.

| **Time / s** | **Absorbance (Trial 1)** | **Absorbance (Trial 2)** | **Absorbance (Trial 3)** |
| --- | --- | --- | --- |
| 20 | 0.331 | 0.333 | 0.330 |
| 30 | 0.315 | 0.317 | 0.314 |
| 40 | 0.301 | 0.303 | 0.300 |
| 50 | 0.285 | 0.287 | 0.284 |
| 60 | 0.274 | 0.276 | 0.273 |
| 70 | 0.260 | 0.262 | 0.259 |
| 80 | 0.248 | 0.249 | 0.247 |
| 90 | 0.235 | 0.236 | 0.234 |
| 100 | 0.223 | 0.224 | 0.222 |
| 110 | 0.213 | 0.214 | 0.212 |
| 120 | 0.203 | 0.204 | 0.202 |
| 130 | 0.192 | 0.193 | 0.191 |
| 140 | 0.182 | 0.183 | 0.181 |
| 150 | 0.173 | 0.174 | 0.172 |
| 160 | 0.163 | 0.164 | 0.163 |
| 170 | 0.155 | 0.156 | 0.155 |
| 180 | 0.147 | 0.148 | 0.147 |
| 190 | 0.140 | 0.141 | 0.140 |
| 200 | 0.132 | 0.133 | 0.132 |
| 210 | 0.125 | 0.126 | 0.125 |
| 220 | 0.118 | 0.119 | 0.118 |
| 230 | 0.112 | 0.113 | 0.112 |
| 240 | 0.106 | 0.107 | 0.106 |
| 250 | 0.100 | 0.101 | 0.100 |
| 260 | 0.094 | 0.095 | 0.094 |
| 270 | 0.088 | 0.089 | 0.088 |
| 280 | 0.084 | 0.085 | 0.084 |
| 290 | 0.079 | 0.079 | 0.079 |
| 300 | 0.074 | 0.075 | 0.074 |
| **Kobs** | **0.00439** | **0.00443** | **0.00442** |
| **Average kobs = 0.00441** | **Standard deviation = 2.08 x 10-5** | **Standard Error = 1.20 x 10-5** |  |

**Table 4S**: Absorbance of the reaction mixture versus time at the following conditions: [PEG 600] = 1.25 × 10-4 mol dm-3, [Ce(IV)] = 6.0 × 10-4 mol dm-3 and [H2SO4] = 0.20 mol dm-3 at 298 K.

| Time | Absorbance |
| --- | --- |
| 20 | 0.344 |
| 30 | 0.331 |
| 40 | 0.328 |
| 50 | 0.326 |
| 60 | 0.325 |
| 70 | 0.325 |
| 80 | 0.325 |
| 90 | 0.325 |
| 100 | 0.325 |
| 110 | 0.325 |
| 120 | 0.325 |
| 130 | 0.325 |
| 140 | 0.325 |
| 150 | 0.325 |
| 160 | 0.325 |

**Table 5S**: Absorbance of the reaction mixture versus Time at the following conditions: [PEG 1500] = 1.25 × 10-4 mol dm-3, [Ce(IV)] = 6.0 × 10-4 mol dm-3 and [H2SO4] = 0.20 mol dm-3 at 298 K.

| Time | Absorbance |
| --- | --- |
| 20 | 0.321 |
| 30 | 0.299 |
| 40 | 0.285 |
| 50 | 0.281 |
| 60 | 0.28 |
| 70 | 0.28 |
| 80 | 0.28 |
| 90 | 0.28 |
| 100 | 0.28 |
| 110 | 0.28 |
| 120 | 0.28 |
| 130 | 0.28 |
| 140 | 0.28 |
| 150 | 0.28 |
| 160 | 0.28 |

**Table 6S**: Absorbance of the reaction mixture versus Time at the following conditions: [PEG 4000] = 1.25 × 10-4 mol dm-3, [Ce(IV)] = 6.0 × 10-4 mol dm-3 and [H2SO4] = 0.20 mol dm-3 at 298 K.

| Time | Absorbance |
| --- | --- |
| 20 | 0.355 |
| 30 | 0.338 |
| 40 | 0.33 |
| 50 | 0.325 |
| 60 | 0.322 |
| 70 | 0.321 |
| 80 | 0.321 |
| 90 | 0.321 |
| 100 | 0.321 |
| 110 | 0.321 |
| 120 | 0.321 |
| 130 | 0.321 |
| 140 | 0.321 |
| 150 | 0.321 |
| 160 | 0.321 |

**Table 7S**: Absorbance of the reaction mixture versus Time at the following conditions: [PVP] = 1.25 × 10-4 mol dm-3, [Ce(IV)] = 6.0 × 10-4 mol dm-3 and [H2SO4] = 0.20 mol dm-3 at 298 K.

| Time | Absorbance |
| --- | --- |
| 20 | 0.245 |
| 30 | 0.221 |
| 40 | 0.209 |
| 50 | 0.207 |
| 60 | 0.207 |
| 70 | 0.207 |
| 80 | 0.207 |
| 90 | 0.207 |
| 100 | 0.207 |
| 110 | 0.207 |
| 120 | 0.207 |
| 130 | 0.207 |
| 140 | 0.207 |
| 150 | 0.207 |
| 160 | 0.207 |

**Table 8S:** Absorbance vs. time at the following conditions: [Ce(IV)] = 6.0 x 10-4 mol dm-3, [maltose] = 6.0 x 10-3 mol dm-3 and [H+] = 0.020 mol dm-3, [PEG 600] = 1.0 x 10-3 mol dm-3, and at 293 K.

| **Time / s** | **Absorbance (Trial 1)** | **Absorbance (Trial 2)** | **Absorbance (Trial 3)** |
| --- | --- | --- | --- |
| 20 | 0.33 | 0.335 | 0.340 |
| 30 | 0.312 | 0.318 | 0.321 |
| 40 | 0.296 | 0.302 | 0.305 |
| 50 | 0.274 | 0.279 | 0.282 |
| 60 | 0.254 | 0.259 | 0.261 |
| 70 | 0.236 | 0.241 | 0.243 |
| 80 | 0.22 | 0.224 | 0.226 |
| 90 | 0.205 | 0.208 | 0.211 |
| 100 | 0.191 | 0.196 | 0.197 |
| 110 | 0.177 | 0.180 | 0.182 |
| 120 | 0.165 | 0.168 | 0.170 |
| 130 | 0.153 | 0.156 | 0.157 |
| 140 | 0.143 | 0.146 | 0.147 |
| 150 | 0.133 | 0.136 | 0.137 |
| 160 | 0.124 | 0.126 | 0.128 |
| 170 | 0.115 | 0.117 | 0.118 |
| 180 | 0.109 | 0.111 | 0.112 |
| 190 | 0.1 | 0.102 | 0.103 |
| 200 | 0.093 | 0.095 | 0.096 |
| 210 | 0.087 | 0.089 | 0.090 |
| 220 | 0.082 | 0.084 | 0.084 |
| 230 | 0.077 | 0.079 | 0.079 |
| 240 | 0.072 | 0.073 | 0.074 |
| 250 | 0.068 | 0.069 | 0.070 |
| 260 | 0.063 | 0.064 | 0.065 |
| 270 | 0.06 | 0.061 | 0.062 |
| 280 | 0.057 | 0.058 | 0.059 |
| 290 | 0.054 | 0.055 | 0.056 |
| 300 | 0.051 | 0.052 | 0.052 |
| **Kobs** | **0.00731** | **0.00727** | **0.00730** |
| **Average kobs = 0.00729** | **Standard deviation = 2.08 x 10-5** | **Standard Error = 1.20 x 10-5** |  |

**Table 9S:** Absorbance vs. time at the following conditions: [Ce(IV)] = 6.0 x 10-4 mol dm-3, [maltose] = 6.0 x 10-3 mol dm-3 and [H+] = 0.020 mol dm-3, [PEG 1500] = 1.0 x 10-3 mol dm-3, and at 293 K.

| **Time / s** | **Absorbance (Trial 1)** | **Absorbance (Trial 2)** | **Absorbance (Trial 3)** |
| --- | --- | --- | --- |
| 20 | 0.350 | 0.382 | 0.375 |
| 30 | 0.333 | 0.354 | 0.355 |
| 40 | 0.312 | 0.332 | 0.333 |
| 50 | 0.291 | 0.310 | 0.310 |
| 60 | 0.272 | 0.290 | 0.290 |
| 70 | 0.253 | 0.270 | 0.270 |
| 80 | 0.237 | 0.254 | 0.253 |
| 90 | 0.22 | 0.235 | 0.235 |
| 100 | 0.207 | 0.221 | 0.221 |
| 110 | 0.195 | 0.209 | 0.208 |
| 120 | 0.179 | 0.192 | 0.191 |
| 130 | 0.168 | 0.180 | 0.179 |
| 140 | 0.157 | 0.168 | 0.167 |
| 150 | 0.146 | 0.156 | 0.156 |
| 160 | 0.136 | 0.146 | 0.145 |
| 170 | 0.128 | 0.137 | 0.137 |
| 180 | 0.12 | 0.128 | 0.128 |
| 190 | 0.112 | 0.120 | 0.119 |
| 200 | 0.105 | 0.112 | 0.112 |
| 210 | 0.098 | 0.105 | 0.105 |
| 220 | 0.092 | 0.098 | 0.098 |
| 230 | 0.087 | 0.093 | 0.093 |
| 240 | 0.081 | 0.087 | 0.086 |
| 250 | 0.077 | 0.082 | 0.082 |
| 260 | 0.072 | 0.077 | 0.077 |
| 270 | 0.067 | 0.072 | 0.071 |
| 280 | 0.063 | 0.067 | 0.067 |
| 290 | 0.059 | 0.063 | 0.063 |
| 300 | 0.055 | 0.059 | 0.059 |
| **Kobs** | **0.00689** | **0.00700** | **0.00692** |
| **Average kobs = 0.00729** | **Standard deviation = 2.08 x 10-5** | **Standard Error = 3.28 x 10-5** |  |

**Table 10S:** Absorbance vs. time at the following conditions: [Ce(IV)] = 6.0 x 10-4 mol dm-3, [maltose] = 6.0 x 10-3 mol dm-3 and [H+] = 0.020 mol dm-3, [PEG 4000] = 1.0 x 10-3 mol dm-3, and at 293 K..

| **Time / s** | **Absorbance (Trial 1)** | **Absorbance (Trial 2)** | **Absorbance (Trial 3)** |
| --- | --- | --- | --- |
| 20 | 0.347 | 0.358 | 0.378 |
| 30 | 0.298 | 0.309 | 0.329 |
| 40 | 0.276 | 0.287 | 0.307 |
| 50 | 0.258 | 0.269 | 0.289 |
| 60 | 0.238 | 0.248 | 0.268 |
| 70 | 0.218 | 0.228 | 0.248 |
| 80 | 0.203 | 0.213 | 0.233 |
| 90 | 0.187 | 0.197 | 0.217 |
| 100 | 0.172 | 0.182 | 0.202 |
| 110 | 0.157 | 0.167 | 0.187 |
| 120 | 0.146 | 0.156 | 0.176 |
| 130 | 0.134 | 0.144 | 0.164 |
| 140 | 0.122 | 0.132 | 0.152 |
| 150 | 0.111 | 0.121 | 0.141 |
| 160 | 0.102 | 0.112 | 0.132 |
| 170 | 0.092 | 0.102 | 0.122 |
| 180 | 0.084 | 0.094 | 0.114 |
| 190 | 0.076 | 0.085 | 0.105 |
| 200 | 0.069 | 0.078 | 0.098 |
| 210 | 0.063 | 0.072 | 0.092 |
| 220 | 0.056 | 0.065 | 0.085 |
| 230 | 0.05 | 0.059 | 0.079 |
| 240 | 0.045 | 0.054 | 0.074 |
| 250 | 0.04 | 0.049 | 0.069 |
| 260 | 0.036 | 0.045 | 0.065 |
| 270 | 0.032 | 0.041 | 0.061 |
| 280 | 0.029 | 0.038 | 0.058 |
| 290 | 0.026 | 0.035 | 0.055 |
| 300 | 0.023 | 0.032 | 0.052 |
| **Kobs** | **0.00777** | **0.00775** | **0.0078** |
| **Average kobs = 0.00778** | **Standard deviation = 2.51 x 10-5** | **Standard Error = 1.45 x 10-5** |  |

**Table 11S:** Absorbance vs. time at the following conditions: [Ce(IV)] = 6.0 x 10-4 mol dm-3, [maltose] = 6.0 x 10-3 mol dm-3 and [H+] = 0.020 mol dm-3, [PVP] = 1.0 x 10-3 mol dm-3, and at 293 K.

| **Time / s** | **Absorbance (Trial 1)** | **Absorbance (Trial 2)** | **Absorbance (Trial 3)** |
| --- | --- | --- | --- |
| 20 | 0.183 | 0.163 | 0.171 |
| 30 | 0.163 | 0.143 | 0.151 |
| 40 | 0.146 | 0.126 | 0.134 |
| 50 | 0.13 | 0.11 | 0.118 |
| 60 | 0.116 | 0.096 | 0.104 |
| 70 | 0.102 | 0.082 | 0.09 |
| 80 | 0.091 | 0.071 | 0.079 |
| 90 | 0.08 | 0.06 | 0.068 |
| 100 | 0.07 | 0.05 | 0.058 |
| 110 | 0.06 | 0.04 | 0.048 |
| 120 | 0.052 | 0.032 | 0.04 |
| 130 | 0.046 | 0.026 | 0.034 |
| 140 | 0.038 | 0.018 | 0.026 |
| 150 | 0.032 | 0.012 | 0.02 |
| **Kobs** | **0.00943** | **0.00960** | **0.00926** |
| **Average kobs = 0.00943** | **Standard deviation = 1.71 x 10-4** | **Standard Error = 9.81 x 10-5** |  |

**Table 12S:** Absorbance vs. time at the following conditions: [Ce(IV)] = 6.0 x 10-4 mol dm-3, [maltose] = 6.0 x 10-3 mol dm-3 and [H+] = 0.020 mol dm-3, [SDS] = 1.0 x 10-3 mol dm-3, and at 293 K.

| **Time / s** | **Absorbance (Trial 1)** | **Absorbance (Trial 2)** | **Absorbance (Trial 3)** |
| --- | --- | --- | --- |
| 20 | 0.334 | 0.327 | 0.349 |
| 30 | 0.318 | 0.311 | 0.333 |
| 40 | 0.3 | 0.293 | 0.315 |
| 50 | 0.285 | 0.278 | 0.300 |
| 60 | 0.267 | 0.260 | 0.282 |
| 70 | 0.251 | 0.244 | 0.266 |
| 80 | 0.238 | 0.231 | 0.253 |
| 90 | 0.224 | 0.217 | 0.239 |
| 100 | 0.209 | 0.202 | 0.224 |
| 110 | 0.196 | 0.189 | 0.211 |
| 120 | 0.185 | 0.178 | 0.200 |
| 130 | 0.172 | 0.165 | 0.187 |
| 140 | 0.16 | 0.153 | 0.175 |
| 150 | 0.149 | 0.142 | 0.164 |
| 160 | 0.139 | 0.132 | 0.154 |
| 170 | 0.128 | 0.121 | 0.143 |
| 180 | 0.12 | 0.113 | 0.135 |
| 190 | 0.11 | 0.103 | 0.125 |
| 200 | 0.102 | 0.095 | 0.117 |
| 210 | 0.093 | 0.086 | 0.108 |
| 220 | 0.085 | 0.078 | 0.100 |
| 230 | 0.078 | 0.071 | 0.093 |
| 240 | 0.072 | 0.065 | 0.087 |
| 250 | 0.064 | 0.057 | 0.079 |
| 260 | 0.058 | 0.051 | 0.073 |
| **Kobs** | **0.00439** | **0.00443** | **0.00439** |
| **Average kobs = 0.00441** | **Standard deviation = 1.73 x 10-5** | **Standard Error = 1.00 x 10-5** |  |

**Table 13S:** Absorbance vs. time at the following conditions: [Ce(IV)] = 6.0 x 10-4 mol dm-3, [maltose] = 6.0 x 10-3 mol dm-3 and [H+] = 0.020 mol dm-3, [CTAB] = 1.0 x 10-4 mol dm-3, and at 293 K.

| **Time / s** | **Absorbance (Trial 1)** | **Absorbance (Trial 2)** | **Absorbance (Trial 3)** |
| --- | --- | --- | --- |
| 20 | 0.300 | 0.306 | 0.317 |
| 30 | 0.272 | 0.277 | 0.288 |
| 40 | 0.248 | 0.253 | 0.264 |
| 50 | 0.228 | 0.233 | 0.244 |
| 60 | 0.208 | 0.212 | 0.223 |
| 70 | 0.189 | 0.193 | 0.204 |
| 80 | 0.173 | 0.176 | 0.187 |
| 90 | 0.155 | 0.158 | 0.169 |
| 100 | 0.142 | 0.145 | 0.156 |
| 110 | 0.129 | 0.132 | 0.143 |
| 120 | 0.117 | 0.119 | 0.130 |
| 130 | 0.105 | 0.107 | 0.118 |
| 140 | 0.094 | 0.096 | 0.107 |
| 150 | 0.084 | 0.086 | 0.097 |
| 160 | 0.077 | 0.079 | 0.090 |
| 170 | 0.067 | 0.068 | 0.079 |
| 180 | 0.061 | 0.062 | 0.073 |
| 190 | 0.054 | 0.055 | 0.066 |
| 200 | 0.048 | 0.049 | 0.060 |
| 210 | 0.042 | 0.043 | 0.054 |
| 220 | 0.037 | 0.038 | 0.049 |
| 230 | 0.032 | 0.033 | 0.044 |
| 240 | 0.028 | 0.029 | 0.040 |
| 250 | 0.025 | 0.026 | 0.037 |
| 260 | 0.021 | 0.021 | 0.032 |
| **Kobs** | **0.00842** | **0.00843** | **0.00842** |
| **Average kobs = 0.00841** | **Standard deviation = 5.77 x 10-6** | **Standard Error = 3.33x 10-6** |  |

**Table 14S:** Absorbance vs. time at the following conditions: [Ce(IV)] = 6.0 x 10-4 mol dm-3, [maltose] = 6.0 x 10-3 mol dm-3 and [H+] = 0.020 mol dm-3, [Tween 20] = 1.0 x 10-5 mol dm-3 , and at 293 K..

| **Time / s** | **Absorbance (Trial 1)** | **Absorbance (Trial 2)** | **Absorbance (Trial 3)** |
| --- | --- | --- | --- |
| 20 | 0.272 | 0.275 | 0.293 |
| 30 | 0.248 | 0.253 | 0.266 |
| 40 | 0.226 | 0.231 | 0.244 |
| 50 | 0.208 | 0.212 | 0.225 |
| 60 | 0.191 | 0.195 | 0.208 |
| 70 | 0.173 | 0.176 | 0.189 |
| 80 | 0.158 | 0.161 | 0.174 |
| 90 | 0.141 | 0.144 | 0.157 |
| 100 | 0.126 | 0.129 | 0.142 |
| 110 | 0.112 | 0.114 | 0.127 |
| 120 | 0.099 | 0.101 | 0.114 |
| 130 | 0.086 | 0.088 | 0.101 |
| 140 | 0.075 | 0.077 | 0.090 |
| 150 | 0.064 | 0.065 | 0.078 |
| 160 | 0.053 | 0.054 | 0.067 |
| 170 | 0.045 | 0.046 | 0.059 |
| 180 | 0.036 | 0.037 | 0.050 |
| 190 | 0.029 | 0.030 | 0.043 |
| 200 | 0.022 | 0.022 | 0.035 |
| 210 | 0.016 | 0.016 | 0.029 |
| 220 | 0.013 | 0.013 | 0.026 |
| 230 | 0.01 | 0.010 | 0.023 |
| 240 | 0.008 | 0.008 | 0.021 |
| **Kobs** | **0.00707** | **0.00702** | **0.00714** |
| **Average kobs = 0.00708** | **Standard deviation = 6.02 x 10-5** | **Standard Error = 3.48x 10-5** |  |

Figure 1S: Time resolved absorbance vs wavelength plot for Ce(IV) during the progress of the reaction

Figure 2S: Applicability of the Piszkiewicz model to explain the micellar effect on kobs for the oxidation of maltose by Ce(IV) in aqueous H2SO4 media in the presence of the PEG (600, 1500 and 4000) at the following conditions: [maltose] = 0.03 mol dm-3, [Ce(IV)] = 0.003 mol dm-3 mol dm-3, [H2SO4] = 2.0 mol dm-3 at 293 K.

Figure 3S: Applicability of the Piszkiewicz model to explain the micellar effect on kobs for the oxidation of maltose by Ce(IV) in aqueous H2SO4 media in the presence of the PVP at the following conditions: [maltose] = 0.03 mol dm-3, [Ce(IV)] = 0.003 mol dm-3 mol dm-3, [H2SO4] = 2.0 mol dm-3 at 293 K.

Figure 4S: Applicability of the Piszkiewicz model to explain the micellar effect on kobs for the oxidation of maltose by Ce(IV) in aqueous H2SO4 media in the presence of the SDS at the following conditions: [maltose] = 0.03 mol dm-3, [Ce(IV)] = 0.003 mol dm-3 mol dm-3, [H2SO4] = 2.0 mol dm-3 at 293 K.

Figure 5S: Applicability of the Piszkiewicz model to explain the micellar effect on kobs for the oxidation of maltose by Ce(IV) in aqueous H2SO4 media in the presence of the CTAB at the following conditions: [maltose] = 0.03 mol dm-3, [Ce(IV)] = 0.003 mol dm-3 mol dm-3, [H2SO4] = 2.0 mol dm-3 at 293 K.

Figure 6S: Applicability of the Piszkiewicz model to explain the micellar effect on kobs for the oxidation of maltose by Ce(IV) in aqueous H2SO4 media in the presence of the Tween 20 at the following conditions: [maltose] = 0.03 mol dm-3, [Ce(IV)] = 0.003 mol dm-3 mol dm-3, [H2SO4] = 2.0 mol dm-3 at 293 K.
